# Supplementary material for: Association of Selective Serotonin Reuptake Inhibitor Use With Abnormal Physical Movement Patterns as Detected Using a Piezoelectric Accelerometer and Deep Learning in a Nationally Representative Sample of Noninstitutionalized Persons in the US
Source: PubMed Central journal article supplement (PMC8990330; doi:10.1001/jamanetworkopen.2022.5403), 2022-04-07
Supplement: jamanetwopen-e225403-s001.pdf [file jamanetwopen-e225403-s001.pdf]

## Supplementary Online Content

Heinz MV, Price GD, Ruan F, et al. Association of selective serotonin reuptake inhibitor use with abnormal physical movement patterns as detected using a piezoelectric accelerometer and deep learning in a nationally representative sample of noninstitutionalized persons in the US. *JAMA Netw Open*. 2022;5(4):e225403. doi:10.1001/jamanetworkopen.2022.5403

**eTable.** Standardized Beta Coefficient Estimates for Both Movement and Depression Score in a General Logistic Regression Model

This supplementary material has been provided by the authors to give readers additional information about their work.

**eTable.** Standardized Beta Coefficient Estimates for Both Movement and Depression Score in a General Logistic Regression Model. Standard error and P value for each estimate are also shown. Both are statistically significant.

|                         | <i>Beta</i> | <i>Standard Error</i> | <i>P-Value</i> |
|-------------------------|-------------|-----------------------|----------------|
| <i>Movement</i>         | 0.72        | 0.22                  | 0.0010*        |
| <i>Depression Score</i> | 0.40        | 0.11                  | 0.0002*        |
